# Supplementary material
Source: PubMed Central journal article supplement (PMC4789888)
Supplement: fril003043.ww1_default.pdf [file fril003043.ww1_default.pdf]

2

**Web appendix: Supplementary material**

4

**Web only Table w1**

6

**Definitions of endpoints and comorbidities by ICD-10 codes**

| <b>Diagnosis</b>                                        | <b>ICD-10 code beginning with</b>                                                                   |
|---------------------------------------------------------|-----------------------------------------------------------------------------------------------------|
| <b>Endpoint</b>                                         |                                                                                                     |
| Stroke                                                  | I63-64                                                                                              |
| <b>Comorbidities</b>                                    |                                                                                                     |
| Ischemic stroke (narrow def)                            | I63 as first diagnosis only                                                                         |
| Other thromboemboli                                     | I63 as secondary diagnosis or<br>I64, G45, I74 as first or secondary diagnosis                      |
| Pulmonary embolism                                      | I26                                                                                                 |
| Intracranial bleeding                                   | I60-62                                                                                              |
| Other major bleeding                                    | I850, I983,<br>K25-28 (subcodes 0-2 and 4-6 only)<br>K625, K922, D629                               |
| Anaemia                                                 | D50-64                                                                                              |
| Platelet or coagulation defect                          | D65-69                                                                                              |
| Myocardial infarction                                   | I21, I252                                                                                           |
| Other vascular disease                                  | I65, I70-73                                                                                         |
| Heart failure                                           | I50                                                                                                 |
| Pacemaker/ICD                                           | Z950, Z450 or local implant code                                                                    |
| Hypertension                                            | I10-15                                                                                              |
| Renal disease                                           | N17-19<br>or local code for transplantation or dialysis                                             |
| Liver disease                                           | K70-77<br>or local code for transplantation or resection                                            |
| Diabetes mellitus                                       | E10-14                                                                                              |
| Obesity                                                 | E65-66                                                                                              |
| Thyroid disease                                         | E00-07                                                                                              |
| Emphysema/COPD                                          | J43-44                                                                                              |
| Cancer within preceding 3 years                         | entire C-series                                                                                     |
| Alcohol index<br>(National Board of Health and Welfare) | E244, F10, G312, G621, G721, I426, K292,<br>K70, K860, O354, P043, Q860, T51, Y90-91,<br>Z502, Z714 |
| Dementia                                                | F00-F03                                                                                             |
| Accidental falls<br>(2 or more hospitalizations)        | W00-19                                                                                              |

## Web only Table w2

### 8 Baseline conditions for included and excluded patients

|                                                 |                                   | Men<br>49.7%<br>(n=50.135) | Women<br>50.3%<br>(n=50.667) | p-<br>value | Men<br>49.7%<br>(n=47,245) | Women<br>50.3%<br>(n=34,631) | p-<br>value |
|-------------------------------------------------|-----------------------------------|----------------------------|------------------------------|-------------|----------------------------|------------------------------|-------------|
| Age, years                                      | Mean±s.d.                         | 74.7±13.5                  | 80.9±10.6                    | <0.001      | 72.7±10.8                  | 77.5±9.3                     | <0.001      |
|                                                 | Median                            | 78                         | 83                           |             | 74                         | 79                           |             |
| AF history                                      | First ever < 7 days               | 62%                        | 62%                          | 0.13        | 56%                        | 55%                          | <0.001      |
| Medical history<br>– more<br>common<br>in women | Thyroid disease                   | 2%                         | 10%                          | <0.001      | 2                          | 10                           | <0.001      |
|                                                 | Frequent falls                    | 6%                         | 13%                          | <0.001      | 3                          | 7                            | <0.001      |
|                                                 | Dementia                          | 5%                         | 7%                           | <0.001      | 1.8                        | 2.7                          | 0.001       |
|                                                 | Pulmonary embolism                | 1.6%                       | 2.2%                         | <0.001      | 3                          | 5                            | <0.001      |
|                                                 | Ischaemic stroke<br>(narrow def)* | 13%                        | 16%                          | <0.001      | 14%                        | 18%                          | <0.001      |
|                                                 | Other thromboemboli*              | 6%                         | 7%                           |             | 8                          | 9                            |             |
|                                                 | Anaemia                           | 12%                        | 14%                          | <0.001      | 7                          | 9                            | <0.001      |
|                                                 | Hypertension                      | 38%                        | 46%                          | <0.001      | 41                         | 48                           | <0.001      |
|                                                 | Heart failure                     | 31%                        | 35%                          | <0.001      | 37                         | 37                           | 0.42        |
| Medical history<br>– more<br>common<br>in men   | Intracranial bleeding             | 2.6%                       | 2.0%                         | <0.001      | 1.6                        | 1.3                          | 0.001       |
|                                                 | Other major bleeding              | 6%                         | 6%                           |             | 4                          | 4                            |             |
|                                                 | Pacemaker                         | 7%                         | 6%                           | <0.001      | 10                         | 10                           | 0.022       |
|                                                 | Diabetes                          | 18%                        | 17%                          | <0.001      | 20                         | 18                           | <0.001      |
|                                                 | Emphysema/COPD                    | 9%                         | 7%                           | <0.001      | 7                          | 7                            | 0.98        |
|                                                 | Myocardial infarction             | 22%                        | 18%                          | <0.001      | 20                         | 16                           | <0.001      |
|                                                 | Other vasc. disease **            | 6%                         | 5%                           |             | 6                          | 5                            |             |
|                                                 | Cancer within 3 years             | 14%                        | 9%                           | <0.001      | 9                          | 7                            | <0.001      |
|                                                 | Platelet/coag. defects            | 1.6%                       | 1.1%                         | <0.001      | 2.2                        | 1.8                          | <0.001      |
|                                                 | Renal disease                     | 7%                         | 5%                           | <0.001      | 6                          | 4                            | <0.001      |
|                                                 | Liver disease                     | 1.7%                       | 1.1%                         | <0.001      | 0.9                        | 0.7                          | 0.001       |
| Alcohol index***                                | 5%                                | 1%                         | <0.001                       | 2.1         | 0.5                        | <0.001                       |             |
| Risk score                                      | CHADS2                            | 1.9±1.4                    | 2.3±1.4                      | <0.001      | 1.9±1.4                    | 2.3±1.4                      | <0.001      |
|                                                 | CHA2DS2-VASc                      | 3.0±1.8                    | 4.4±1.7                      | <0.001      | 3.0±1.7                    | 4.4±1.6                      | <0.001      |
| Antithrombotic<br>medication                    | ASA only                          | 58%                        | 63%                          | <0.001      | n/a                        | n/a                          | -           |
|                                                 | Clopidogrel only                  | 1.8%                       | 2.1%                         | 0.001       | n/a                        | n/a                          | -           |
|                                                 | ASA+Clopidogrel                   | 6%                         | 4%                           | <0.001      | n/a                        | n/a                          | -           |
|                                                 | None of the above                 | 35%                        | 31%                          | <0.001      | n/a                        | n/a                          | -           |
| Other<br>medication                             | Betablocker                       | 60%                        | 65%                          | <0.001      | 73                         | 75                           | <0.001      |
|                                                 | Class 1 AA                        | 2.5%                       | 1.8%                         | <0.001      | 3.2                        | 2.7                          | <0.001      |
|                                                 | Class 3 AA                        | 8%                         | 6%                           | <0.001      | 11                         | 9                            | <0.001      |
|                                                 | Verapamil/Diltiazem               | 4%                         | 5%                           | <0.001      | 5                          | 8                            | <0.001      |
|                                                 | Ca-blocker<br>dihydropyridine     | 16%                        | 18%                          | <0.001      | 19                         | 19                           | 0.73        |
|                                                 | Digoxin                           | 21%                        | 29%                          | <0.001      | 29                         | 37                           | <0.001      |
|                                                 | Diuretics                         | 49%                        | 63%                          | <0.001      | 55                         | 67                           | <0.001      |
|                                                 | ACEI/ARB                          | 41%                        | 39%                          | <0.001      | 59                         | 52                           | <0.001      |
| Statin                                          | 26%                               | 19%                        | <0.001                       | 39          | 30                         | <0.001                       |             |

Exclusion criteria: Warfarin at baseline, death during index hospital period, mitral stenosis or previous valvular surgery.

\*Ischaemic stroke (narrow def) is a prior diagnosis of ischaemic stroke (I63) as principal diagnosis only, Other thromboemboli is a prior secondary diagnosis of ischaemic stroke (I63), or principal or secondary diagnosis of unspecified stroke (I64), TIA (G45) or peripheral emboli (I74). \*\*Alcohol index is a set of diagnostic codes used by the Swedish Board of Health of Welfare since 1987 when reporting alcohol related mortality (Definition in appendix). Medication at baseline defined as prescribed and purchased medication within 90 days before or after index date.

### Web only Table w3

#### Risk estimates of covariates included in the multivariable Cox model regarding ischaemic stroke

|                                   | HR                         | 95 % CI      | p-value      |        |
|-----------------------------------|----------------------------|--------------|--------------|--------|
| Age (per year)                    | 1.04                       | 1.03 to 1.04 | <0.001       |        |
| Thromboembolism                   |                            |              | <0.001       |        |
| Ischemic stroke (narrow def)      | 3.35                       | 3.18 to 3.53 | <0.001       |        |
| Other thromboemboli               | 2.17                       | 2.01 to 2.35 | <0.001       |        |
| Heart failure                     | 0.99                       | 0.94 to 1.05 | 0.70         |        |
| Diabetes mellitus                 | 1.13                       | 1.06 to 1.20 | <0.001       |        |
| Hypertension                      | 1.11                       | 1.06 to 1.17 | <0.001       |        |
| Vascular disease                  |                            |              | 0.075        |        |
| Myocardial infarction             | 1.01                       | 0.95 to 1.07 | 0.78         |        |
| Other vascular disease            | 1.12                       | 1.02 to 1.23 | 0.023        |        |
| Bleeding                          |                            |              | <0.001       |        |
| Intracranial bleeding             | 1.57                       | 1.39 to 1.77 | <0.001       |        |
| Other major bleeding              | 1.03                       | 0.94 to 1.14 | 0.52         |        |
| Pacemaker                         | 0.87                       | 0.79 to 0.95 | 0.003        |        |
| Emphysema/COPD                    | 0.99                       | 0.90 to 1.09 | 0.83         |        |
| Pulmonary embolism                | 0.90                       | 0.75 to 1.08 | 0.27         |        |
| Thyroid disease                   | 1.00                       | 0.91 to 1.09 | 0.98         |        |
| Platelet or coagulation defect    | 0.90                       | 0.72 to 1.12 | 0.34         |        |
| Anaemia                           | 0.94                       | 0.87 to 1.01 | 0.11         |        |
| Renal disease                     | 1.15                       | 1.04 to 1.27 | 0.008        |        |
| Liver disease                     | 0.98                       | 0.77 to 1.25 | 0.88         |        |
| Alcohol index                     | 1.23                       | 1.05 to 1.44 | 0.010        |        |
| Dementia                          | 0.78                       | 0.70 to 0.86 | <0.001       |        |
| Frequent falls                    | 0.86                       | 0.79 to 0.93 | <0.001       |        |
| Cancer within 3 years             | 1.03                       | 0.95 to 1.12 | 0.46         |        |
| Years since first diagnosis of AF | 0.99                       | 0.98 to 1.00 | 0.12         |        |
| Medication at baseline            | ASA                        | 1.21         | 1.14 to 1.28 | <0.001 |
|                                   | Clopidogrel                | 1.06         | 0.97 to 1.16 | 0.22   |
|                                   | Beta-blocker               | 1.25         | 1.18 to 1.32 | <0.001 |
|                                   | Class 1 AA                 | 0.88         | 0.71 to 1.09 | 0.24   |
|                                   | Class 3 AA                 | 0.95         | 0.86 to 1.05 | 0.33   |
|                                   | Verapamil/Diltiazem        | 1.33         | 1.20 to 1.47 | <0.001 |
|                                   | Ca-blocker dihydropyridine | 1.06         | 0.99 to 1.12 | 0.08   |
|                                   | Digoxin                    | 1.01         | 0.96 to 1.07 | 0.59   |
|                                   | Diuretics                  | 0.95         | 0.90 to 1.01 | 0.08   |
|                                   | ACEI/ARB                   | 1.05         | 0.99 to 1.10 | 0.08   |
|                                   | Statin                     | 0.95         | 0.90 to 1.01 | 0.12   |

Adjustments made for age, previous embolic event, heart failure, diabetes, hypertension, vascular disease, intracranial bleed, pacemaker, COPD, pulmonary embolism, thyroid disease, platelet defect or coagulopathy, anaemia, renal failure, liver disease, alcohol index, dementia, frequent falls, cancer within three years, years since first diagnosis of AF, medication with ASA, clopidogrel, betablocker, class I AA, class 3 AA, verapamil/diltiazem, dihydropyridine Ca-blocker, digoxin, diuretics, ACEI/ARB and statin. Reference is “No” for all categorical variables.
